# Supplementary material
Source: PubMed Central journal article supplement (PMC6990835)
Supplement: jamainternmed-180-420-s001.pdf [file jamainternmed-180-420-s001.pdf]

## Supplementary Online Content

Turgeon RD, Koshman SL, Youngson E, et al. Association of ticagrelor vs clopidogrel with major adverse coronary events in patients with acute coronary syndrome undergoing percutaneous coronary intervention. *JAMA Intern Med*. Published online January 13, 2020. doi:10.1001/jamainternmed.2019.6447

**eAppendix.** Major bleeding ICD-10 codes

**eFigure.** Study drug by fiscal year

**eTable 1.** Baseline characteristics by antiplatelet group in propensity score-matched cohort

**eTable 2.** Major adverse coronary events within 1 year after percutaneous coronary intervention for acute coronary syndrome adjusted for the Cardiac-Specific Comorbidity Index

**eTable 3.** Subgroup analyses

**eTable 4.** Multivariate model for effectiveness and safety outcomes within 1 year after percutaneous coronary intervention for acute coronary syndrome

**eTable 5.** Sensitivity analysis: Stepwise addition of covariates to multivariate analysis of ticagrelor versus clopidogrel on major adverse coronary events within 1 year after percutaneous coronary intervention for acute coronary syndrome

This supplementary material has been provided by the authors to give readers additional information about their work.

## **eAppendix 1. Major bleeding ICD-10 codes**

Intracranial bleed: I60.0-I60.9, I61.0-I61.6, I61.8, I61.9, I62.0, I62.1, I62.9

Gastrointestinal bleed: I85.0, I98.3, K22.1, K25.0, K25.2, K25.4, K25.6, K26.0, K26.2, K26.4, K26.6, K27.0, K27.2, K27.4, K27.6, K28.0, K28.2, K28.4, K28.6, K29.0, K62.5, K66.1, K92.0, K92.1, K92.2

Pulmonary bleed: R040, R041, R042, R048, R049

Urologic bleed: N02.0-N02.9, R31.0, R31.1, R31.8

Other bleed: R58, T810

**eFigure.** Study drug by fiscal year

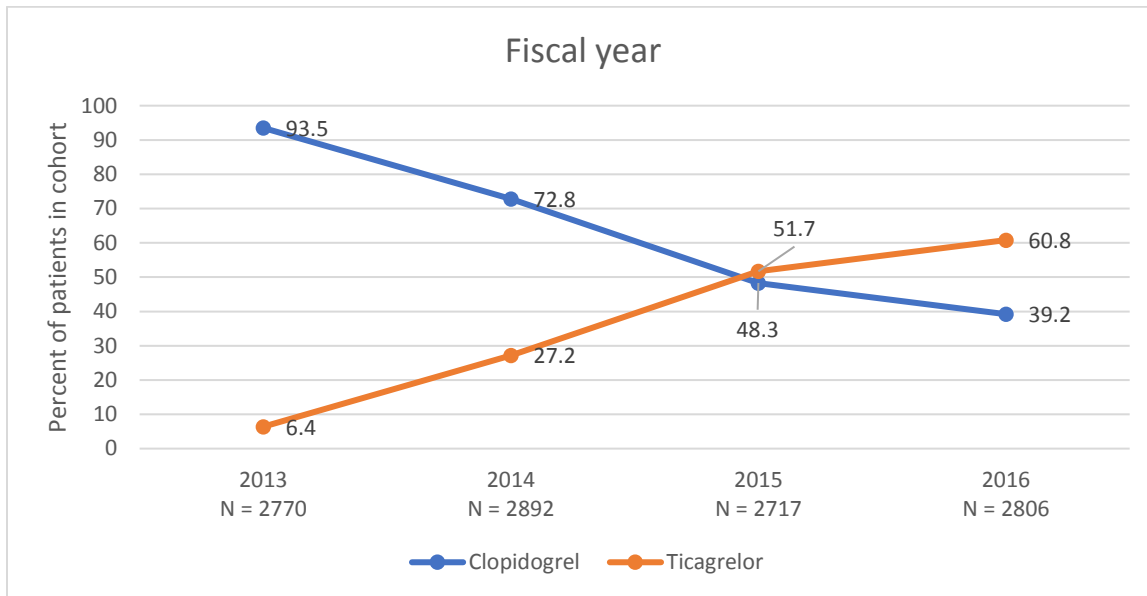

**eTable 1.** Baseline characteristics by antiplatelet group in propensity score-matched cohort

| Characteristic                                   | Clopidogrel (n=3711) | Ticagrelor (n=3711) | Standardized difference |
|--------------------------------------------------|----------------------|---------------------|-------------------------|
| Age, median (IQR), years                         | 61 (53, 71)          | 61 (54, 69)         | -0.0525                 |
| Female, No. (%)                                  | 905 (24.4)           | 859 (23.1)          | -0.0291                 |
| ACS type, No. (%)                                |                      |                     | 0.0333                  |
| STEMI                                            | 1564 (42.1)          | 1604 (43.2)         |                         |
| NSTEMI                                           | 1567 (42.2)          | 1537 (41.4)         |                         |
| Unstable Angina                                  | 559 (15.1)           | 542 (14.6)          |                         |
| Unknown                                          | 21 (0.6)             | 28 (0.8)            |                         |
| Cardiovascular history and risk factors, No. (%) |                      |                     |                         |
| Prior MI                                         | 313 (8.4)            | 284 (7.7)           | -0.0287                 |
| Prior CABG                                       | 167 (4.5)            | 161 (4.3)           | -0.0079                 |
| Prior PCI                                        | 471 (12.7)           | 443 (11.9)          | -0.023                  |
| Cerebrovascular disease                          | 120 (3.2)            | 118 (3.2)           | -0.0031                 |
| Peripheral vascular disease                      | 154 (4.1)            | 135 (3.6)           | -0.0265                 |
| Heart failure                                    | 136 (3.7)            | 123 (3.3)           | -0.0191                 |
| Diabetes mellitus                                | 929 (25.0)           | 891 (24.0)          | -0.0238                 |
| Hyperlipidemia                                   | 2030 (54.7)          | 1963 (52.9)         | -0.0362                 |
| Hypertension                                     | 2441 (65.8)          | 2362 (63.6)         | -0.0446                 |
| Smoking status                                   |                      |                     | 0.0358                  |
| Current                                          | 1016 (27.4)          | 1005 (27.1)         |                         |
| Former                                           | 730 (19.7)           | 684 (18.4)          |                         |
| Never/not recorded                               | 1965 (53.0)          | 2022 (54.5)         |                         |
| Other comorbidities, No. (%)                     |                      |                     |                         |
| Chronic pulmonary disease                        | 163 (4.4)            | 146 (3.9)           | -0.0229                 |
| Renal disease                                    | 122 (3.3)            | 106 (2.9)           | -0.025                  |
| Dialysis dependence                              | 16 (0.4)             | 13 (0.4)            | -0.013                  |
| Liver disease                                    | 12 (0.3)             | 15 (0.4)            | 0.0134                  |
| Malignancy                                       | 88 (2.4)             | 89 (2.4)            | 0.0018                  |
| Coronary Anatomy, No. (%)                        |                      |                     | 0.0211                  |
| 1 vessel                                         | 1197 (32.3)          | 1215 (32.7)         |                         |
| 2 vessels                                        | 1011 (27.2)          | 999 (26.9)          |                         |
| 2 vessels including proximal LAD                 | 292 (7.9)            | 275 (7.4)           |                         |
| 3 vessels                                        | 583 (15.7)           | 589 (15.9)          |                         |
| 3 vessels including proximal LAD                 | 490 (13.2)           | 495 (13.3)          |                         |
| Left main                                        | 127 (3.4)            | 128 (3.4)           |                         |
| Minimal CAD                                      | 11 (0.3)             | 10 (0.3)            |                         |
| Ejection fraction, No. (%)                       |                      |                     | 0.0298                  |
| >50                                              | 1242 (33.5)          | 1222 (32.9)         |                         |
| 35-50                                            | 489 (13.2)           | 460 (12.4)          |                         |
| 20-34                                            | 57 (1.5)             | 59 (1.6)            |                         |

|                                     |                |                |        |
|-------------------------------------|----------------|----------------|--------|
| <20                                 | 4 (0.1)        | 4 (0.1)        |        |
| Missing                             | 1919 (51.7)    | 1966 (53.0)    |        |
| Stent placement, No. (%)            | 3485 (93.9)    | 3486 (93.9)    | 0.0011 |
| Drug-eluting stent, No. (%)         | 2761 (74.4)    | 2789 (75.2)    | 0.0174 |
| Laboratory values, median (IQR)     |                |                |        |
| Hemoglobin, g/L                     | 139 (128, 149) | 141 (129, 150) | 0.0489 |
| Serum creatinine, umol/L            | 82 (71, 95)    | 85 (73, 97)    | 0.0098 |
| eGFR, mL/min                        | 76 (61, 91)    | 79 (64, 92)    | 0.0746 |
| Medications within 31 days, No. (%) |                |                |        |
| Oral anticoagulant                  | 121 (3.3)      | 134 (3.6)      | 0.0192 |
| Proton pump inhibitor               | 1159 (31.2)    | 1163 (31.3)    | 0.0023 |

ACS: Acute coronary syndrome; CABG: Coronary artery bypass grafting; eGFR: Estimated glomerular filtration rate; MI: Myocardial infarction; NSTEMI: Non-ST-segment elevation myocardial infarction; PCI: Percutaneous coronary intervention; STEMI: ST-segment elevation myocardial infarction.

**eTable 2.** Major adverse coronary events within 1 year after percutaneous coronary intervention for acute coronary syndrome adjusted for the Cardiac-Specific Comorbidity Index

| <b>Outcome</b>                                     | <b>HR (95% CI) adjusted for CSCI<sup>a</sup></b> |
|----------------------------------------------------|--------------------------------------------------|
| MACE                                               | 0.91 (0.80 - 1.03)                               |
| All-cause death                                    | 0.99 (0.73 - 1.34)                               |
| ACS                                                | 0.89 (0.76 - 1.04)                               |
| Coronary revascularization                         | 0.88 (0.72 - 1.06)                               |
| PCI                                                | 0.89 (0.71 - 1.12)                               |
| CABG                                               | 0.82 (0.55 - 1.21)                               |
| Stent thrombosis                                   | 1.31 (0.71 - 2.42)                               |
| Composite of all-cause death, ACS, ischemic stroke | 0.90 (0.79 - 1.04)                               |

<sup>a</sup>Ticagrelor compared to clopidogrel (reference).

ACS: Acute coronary syndrome; CABG: Coronary artery bypass grafting; CI: Confidence interval; CSCI: Cardiac-Specific Comorbidity Index; HR: Hazard ratio; MACE: Major adverse coronary event; PCI: Percutaneous coronary intervention.

**eTable 3.** Subgroup analyses

| Subgroup                                                     | No. in Subgroup | aHR for MACE       | aHR for Major Bleed                   | aHR for Dyspnea                 |
|--------------------------------------------------------------|-----------------|--------------------|---------------------------------------|---------------------------------|
| Age                                                          |                 |                    |                                       |                                 |
| <65                                                          | 6572            | 0.94 (0.79 - 1.12) | <b>1.50 (1.17 - 1.94)</b>             | <b>1.63 (1.02 - 2.6)</b>        |
| 65-74                                                        | 2625            | 1.03 (0.80 - 1.33) | <b>1.51 (1.13 - 2.02)</b>             | <b>2.42 (1.45 - 4.06)</b>       |
| ≥75                                                          | 1988            | 0.97 (0.73 - 1.28) | <b>1.54 (1.12 - 2.10)</b>             | <b>1.80 (1.02 - 3.15)</b>       |
| Diabetes                                                     |                 |                    |                                       |                                 |
| Yes                                                          | 2775            | 0.93 (0.74 - 1.16) | <b>1.50 (1.08 - 2.08)</b>             | <b>2.45 (1.48 - 4.04)</b>       |
| No                                                           | 8410            | 0.98 (0.84 - 1.15) | <b>1.52 (1.26 - 1.83)</b>             | <b>1.78 (1.24 - 2.56)</b>       |
| eGFR, mL/min                                                 |                 |                    |                                       |                                 |
| ≥60                                                          | 9177            | 0.96 (0.83 - 1.11) | <b>1.50 (1.24 - 1.81)</b>             | <b>2.09 (1.47 - 2.95)</b>       |
| <60                                                          | 1868            | 0.99 (0.75 - 1.30) | <b>1.56 (1.14 - 2.15)</b>             | 1.67 (0.94 - 2.96)              |
| High-risk ACS per PLATO criteria                             |                 |                    |                                       |                                 |
| Yes                                                          | 8862            | 1.02 (0.89 - 1.18) | <b>1.57 (1.31 - 1.89)</b>             | <b>1.89 (1.36 - 2.63)</b>       |
| No                                                           | 2323            | 0.78 (0.58 - 1.05) | 1.29 (0.89 - 1.88)                    | <b>2.48 (1.28 - 4.82)</b>       |
| TIMI Risk Score for Secondary Prevention                     |                 |                    |                                       |                                 |
| ≥3                                                           | 2784            | 0.88 (0.70 - 1.12) | <b>1.83 (1.38 - 2.44)</b>             | <b>2.11 (1.31 - 3.38)</b>       |
| <3                                                           | 8401            | 1.00 (0.86 - 1.16) | <b>1.38 (1.13 - 1.68)</b>             | <b>1.88 (1.29 - 2.73)</b>       |
| Fiscal year of index PCI                                     |                 |                    |                                       |                                 |
| 2013-2014                                                    | 5662            | 0.94 (0.75 - 1.17) | <b>1.77 (1.36 - 2.32)</b>             | <b>2.06 (1.24 - 3.43)</b>       |
| 2015-2016                                                    | 5523            | 0.97 (0.82 - 1.15) | <b>1.34 (1.07 - 1.69)</b>             | <b>1.89 (1.33 - 2.71)</b>       |
| Excluding oral anticoagulant use within 31 days              | 9991            | 0.97 (0.85 - 1.10) | <b>1.49 (1.25 - 1.77)</b>             | <b>2.06 (1.50 - 2.84)</b>       |
| Excluding patients with atrial fibrillation                  | 10376           | 0.97 (0.85 - 1.11) | <b>1.53 (1.29 - 1.81)</b>             | <b>2.19 (1.60 - 3.00)</b>       |
| Excluding patients who switched P2Y <sub>12</sub> inhibitors | 10452           | 0.98 (0.86 - 1.12) | <b>1.40 (1.18 - 1.66)<sup>a</sup></b> | 1.27 (0.90 - 1.78) <sup>a</sup> |

Comparison of ticagrelor compared to clopidogrel, i.e. values below 1.00 indicate lower risk of the outcome with ticagrelor than clopidogrel. Statistically significant results are shown in bold text.

<sup>a</sup> This analysis did not distinguish regarding time of the switch relative to the outcome event (i.e. this analysis excludes participants who switched P2Y<sub>12</sub> inhibitors subsequent to an outcome event).

aHR compares ticagrelor to clopidogrel (reference group) using adjusted model 2 in Table 2.

aHR: Adjusted hazard ratio; eGFR: Estimated glomerular filtration rate; MACE: Major adverse coronary event; PLATO: Platelet Inhibition and Patient Outcomes; TIMI: Thrombolysis in Myocardial Infarction.

**eTable 4.** Multivariate model for effectiveness and safety outcomes within 1 year after percutaneous coronary intervention for acute coronary syndrome

| Variable                       | aHR (95% CI)       | P value |
|--------------------------------|--------------------|---------|
| <b>Outcome = MACE</b>          |                    |         |
| Study drug (ref = clopidogrel) |                    |         |
| Ticagrelor                     | 0.96 (0.85 - 1.09) | 0.56    |

|                                      |                       |        |
|--------------------------------------|-----------------------|--------|
| Age, per year                        | 1.004 (0.999 - 1.010) | 0.09   |
| Female                               | 1.01 (0.88 - 1.17)    | 0.85   |
| Prior PCI                            | 1.20 (1.02 - 1.41)    | 0.03   |
| Diabetes mellitus                    | 1.28 (1.12 - 1.45)    | 0.0002 |
| Hyperlipidemia                       | 0.85 (0.76 - 0.96)    | 0.01   |
| Coronary anatomy (ref = 1 vessel)    |                       |        |
| 2 vessels                            | 1.40 (1.18 - 1.66)    | 0.0001 |
| 2 vessels including proximal LAD     | 1.77 (1.4 - 2.24)     | <.0001 |
| 3 vessels                            | 1.80 (1.50 - 2.16)    | <.0001 |
| 3 vessels including proximal LAD     | 2.24 (1.86 - 2.69)    | <.0001 |
| Left main                            | 3.31 (2.58 - 4.26)    | <.0001 |
| Drug-eluting stent                   | 0.73 (0.65 - 0.82)    | <.0001 |
| Hemoglobin, per 0.1 g/dL             | 0.989 (0.985 - 0.993) | <.0001 |
| Serum creatinine, per 0.0113 mg/dL   | 1.001 (1.001 - 1.002) | <.0001 |
| Proton pump inhibitor within 31 days | 1.19 (1.06 - 1.34)    | 0.003  |
| <b>Outcome = Major bleed</b>         |                       |        |
| Study drug (ref = clopidogrel)       |                       |        |
| Ticagrelor                           | 1.48 (1.26 - 1.74)    | <.0001 |
| Age, per year                        | 1.03 (1.02 - 1.04)    | <.0001 |
| Female                               | 0.85 (0.71 - 1.02)    | 0.09   |
| Malignancy                           | 1.43 (1.03 - 1.99)    | 0.03   |
| Hemoglobin, per 0.1 g/dL             | 0.985 (0.980 - 0.989) | <.0001 |
| Serum creatinine, per 0.0113 mg/dL   | 1.002 (1.001 - 1.003) | 0.0001 |
| Oral anticoagulant within 31 days    | 2.12 (1.76 - 2.57)    | <.0001 |
| <b>Outcome = Dyspnea</b>             |                       |        |
| Study drug (ref = clopidogrel)       |                       |        |
| Ticagrelor                           | 1.98 (1.48 - 2.65)    | <.0001 |
| Age, per year                        | 1.03 (1.01 - 1.04)    | <.0001 |
| Female                               | 1.25 (0.94 - 1.66)    | 0.12   |
| Year of index PCI                    | 1.22 (1.06 - 1.39)    | 0.005  |
| Prior MI                             | 1.48 (1.02 - 2.15)    | 0.04   |
| Diabetes mellitus                    | 1.44 (1.09 - 1.90)    | 0.01   |
| Chronic pulmonary disease            | 2.62 (1.82 - 3.76)    | <.0001 |
| Renal disease                        | 2.41 (1.56 - 3.72)    | <.0001 |

aHR: Adjusted hazard ratio; CI: Confidence interval; LAD: Left anterior descending; MACE: Major adverse coronary event; PCI: Percutaneous coronary intervention.



**eTable 5.** Sensitivity analysis: Stepwise addition of covariates to multivariate analysis of ticagrelor versus clopidogrel on major adverse coronary events within 1 year after percutaneous coronary intervention for acute coronary syndrome

| <b>Model <sup>a</sup></b>              | <b>Adjusted HR (95% CI)</b> |
|----------------------------------------|-----------------------------|
| Unadjusted                             | 0.84 (0.74 - 0.95)          |
| Adjusted for age and sex               | 0.88 (0.78 - 0.995)         |
| + coronary anatomy                     | 0.86 (0.76 - 0.97)          |
| + hemoglobin                           | 0.90 (0.79 - 1.02)          |
| + drug-eluting stent                   | 0.95 (0.84 - 1.08)          |
| + creatinine                           | 0.96 (0.84 - 1.09)          |
| + diabetes mellitus                    | 0.96 (0.85 - 1.09)          |
| + proton pump inhibitor within 31 days | 0.97 (0.85 - 1.10)          |
| + hyperlipidemia                       | 0.96 (0.85 - 1.09)          |
| + prior PCI                            | 0.96 (0.85 - 1.09)          |

<sup>a</sup> Each line includes variables from previous line plus additional variable indicated.

CI: Confidence interval; HR: Hazard ratio; PCI: Percutaneous coronary intervention
